# Supplementary material for: How Regrouping Alerts in Computerized Physician Order Entry Layout Influences Physicians’ Prescription Behavior: Results of a Crossover Randomized Trial
Source: PubMed Central journal article supplement (PMC4911510; doi:10.2196/humanfactors.5320), 2016-06-02
Supplement: humanfactors_v3i1e15_app1.pdf [file humanfactors_v3i1e15_app1.pdf]

# 1. Appendix: Scenarios and alerts

| Scenario Nr | Instructions                                                                                                                                                            | Alerts                                        | Urgency | Severity | Interaction mode |
|-------------|-------------------------------------------------------------------------------------------------------------------------------------------------------------------------|-----------------------------------------------|---------|----------|------------------|
| A1          | Prescrivez à Anne Chatellier 4 x 100 mg de paracétamol Dafalgan per os / jour, dès demain -4j                                                                           | Interaction paracétamol et métoclopramide.    | 1       | 1        | Non-interrupting |
|             |                                                                                                                                                                         | Créatinémie manque.                           | 1       | 0        | Non-interrupting |
| B1          | L'amiodarone (Cordarone) est indispensable à la prise en charge de la patiente Astrid Berges. Veuillez prescrire un traitement initial d'attaque.                       | Prescription à signer.                        | 1       | 0        | Non-interrupting |
|             |                                                                                                                                                                         | Diminuez le dosage de charge.                 | 1       | 1        | Interrupting     |
|             |                                                                                                                                                                         | Diminuez le dosage du traitement d'entretien. | 2       | 1        | Interrupting     |
|             |                                                                                                                                                                         | Ajustez la durée de traitement.               | 2       | 1        | Interrupting     |
| A2          | Prescrivez à Brigitte Gallas un antiflatulent qui est le plus apte pour la patiente. Choisissez entre : Dimenhydrinate, siméthicone Flatulex, diphenhydramine Bonocten. | Patiente est MRSA                             | 1       | 2        | Non-interrupting |

|    |                                                                                                                                                                                                                                                             |                                                              |   |   |                  |
|----|-------------------------------------------------------------------------------------------------------------------------------------------------------------------------------------------------------------------------------------------------------------|--------------------------------------------------------------|---|---|------------------|
|    |                                                                                                                                                                                                                                                             | Note d'admission à signer.                                   | 0 | 0 | Non-interrupting |
|    |                                                                                                                                                                                                                                                             | Enceinte -3 mois                                             | 0 | 0 | Non-interrupting |
|    |                                                                                                                                                                                                                                                             | Dimenhydrinate est déconseillé. 1<br>[pour femmes enceintes] |   | 0 | Non-interrupting |
| B2 | La patiente Caroline Ghezali, dont on sait qu'elle est épileptique, est transportée aux urgences de l'hôpital après une crise épileptique (convulsions). À son arrivée, la patiente est dans un état d'agitation. Prescrivez du clonazépam Rivotril inject. | Rivotril est déconseillé [avec un 0 taux d'alcoolémie élevé] |   | 1 | Non-interrupting |
| A3 | Vous avez un appel du médecin de garde de l'unité OH-4 par rapport au patient Cyril Muller qui souffre d'une embolie pulmonaire. Il est sous un surdosage d'héparine et il faut baisser l'héparine à 5000 UI.                                               | Accès au dossier non autorisé.                               | 2 | 1 | Interrupting     |
|    |                                                                                                                                                                                                                                                             | Antibiogram à ordre                                          | 1 | 0 | Non-interrupting |
| B3 | Carlos Fuentes est suivi depuis une semaine dans le service de cardiologie pour thrombophlébite. Ce matin, il                                                                                                                                               | Accès au dossier non autorisé.                               | 2 | 1 | Interrupting     |

se plaint de fièvre et vous devez prescrire de l'aspirine (acide acetyl salicylique) à raison de 2 cps x 3 fois par jour x 3 jours. Le patient n'est pas sous votre responsabilité.

|    |                                                                                                                                                                                                                                                                               |                                                                  |   |   |                  |
|----|-------------------------------------------------------------------------------------------------------------------------------------------------------------------------------------------------------------------------------------------------------------------------------|------------------------------------------------------------------|---|---|------------------|
|    |                                                                                                                                                                                                                                                                               | Interaction aspirine et héparine.                                | 1 | 0 | Non-interrupting |
| A4 | Brigitte Gallas souffre d'hypertension rénovasculaire. Veuillez prescrire du lisinopril.                                                                                                                                                                                      | Usage de lisinopril fortement déconseillé. [en cas de grossesse] | 2 | 1 | Non-interrupting |
| B4 | Caroline Ghezali est hospitalisée dans le service de néphrologie pour un œdème aigu de poumon (OAP). Elle a une insuffisance rénale aigüe qui évolue depuis 24 heures. Prescrivez un de ces médicaments : hydrochlorothiazide Esidrex, furosémide Lasix, ou mannitol Mannitol | Esidrex est déconseillé.                                         | 1 | 0 | Non-interrupting |
|    |                                                                                                                                                                                                                                                                               | Lasix est contre-indiqué [en cas d'insuffisance rénale].         | 1 | 0 | Non-interrupting |
|    |                                                                                                                                                                                                                                                                               | Mannitol est déconseillé [en cas d'insuffisance rénale].         | 1 | 0 | Non-interrupting |
